# Supplementary material for: RNA-Guided Genome Editing for Target Gene Mutations in Wheat
Source: PubMed Central journal article supplement (PMC3852385; doi:10.1534/g3.113.008847), 2013-10-11
Supplement: supp_g3.113.008847_008847SI.pdf [file supp_g3.113.008847_008847SI.pdf]

## RNA guided genome editing for target gene mutations in wheat

Santosh Kumar Upadhyay, Jitesh Kumar, Anshu Alok, RakeshTuli

National Agri-Food Biotechnology Institute  
(Department of Biotechnology, Government of India)  
C-127, Industrial Area, S.A.S. Nagar, Phase 8,  
Mohali, Punjab, India-160071.

**Corresponding author:**

**RakeshTuli**

Executive Director

National Agri-Food Biotechnology Institute  
(Department of Biotechnology, Government of India)  
C-127, Industrial Area, S.A.S. Nagar, Phase 8,  
Mohali, Punjab, India-160071.

Email: [rakeshtuli@hotmail.com](mailto:rakeshtuli@hotmail.com)

Tel: +91 172 2290101

Fax: +91 172 4604888

**DOI: 10.1534/g3.113.008847**

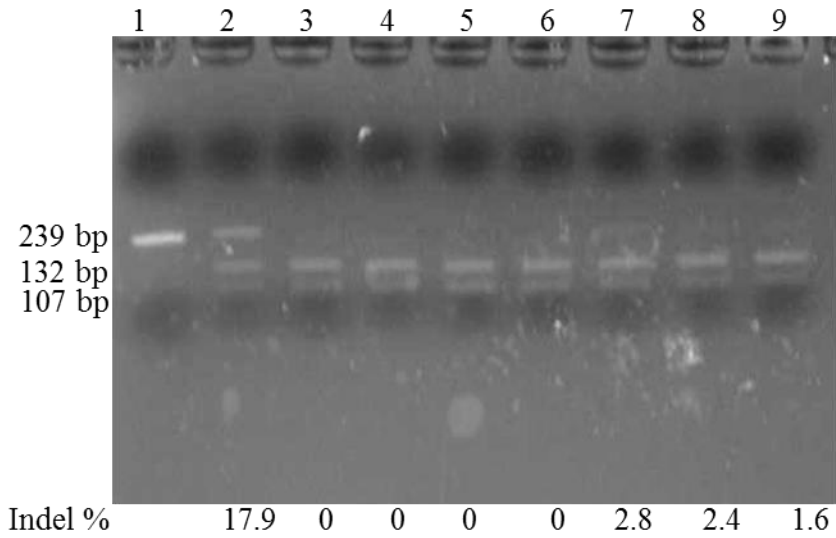

**Figure S1** Sequence specificity analysis of CRISPR-Cas system by using different mutated cgRNAs. List of mutant cgRNA is given in Supplementary table 2. Normal and mutant cgRNAs (targeting protospacer 1 of *inox* gene) were co-expressed with Cas9 in suspension cells of *T. aestivum*. Targeted region was amplified, and digested with BsgI restriction enzyme (BsgI restriction site is present at cleavage position in *inox* protospacer1). BsgI could not digest the mutated DNA amplicon. Lane 1 undigested amplicon and lane 2-9 digested with BsgI. Lane 2, mutated with normal cgRNA; 3, wild type amplicon; 4-9, mutated with mutant cgRNA 1, 6, 9, 11, 12 and 13, respectively. Figure shows that mutations at 3' end of target binding region of cgRNA upto 12<sup>th</sup> bases completely abolished the cleavage activity. However mutations were detected in case of 5' end mutant cgRNA.

File S1

Partial sequence of (A) *inositol oxygenase (inox)* and (B) *phytoene desaturase (pds)* genes of wheat, and (C) *pds* gene of *Nicotiana benthamiana* used to decide the target for modification by CRISPR-Cas System. Targeted regions are shown in blue font and PAM in red. Primer used for amplification of gene after editing is shown in green.

(A)

Forward primer →

GCTCGACGGCGGCTTCACCGTGCCGACTCCAACGCCTTCGGCCACACCTT**CAGGGACTACGACGCGGAG**TCGGA BASE PAIRS  
CGAGCTGCCGCCGAAGTGGCACGGCCTGAGGTTGCGGAAGCCGGTGTGGAAGTCCCTGATGCTGCGCCTCAGCCT 1 TO 75

Protospacer 1

GCGGAAGAAGACGGTGGAGGAGTTCTACAGCGTGAACCACATCAACC**AGACGTACGAGTTTGTGCAG**CGGATGCG BASE PAIRS  
CGCCTTCTTCTGCCACCTCCTCAAGATGTCGCACTTGGTGTAGTTGGTCTGCATGCTCAAACACGTTCGCCTACGC 76 TO 150

Protospacer 2

GGACGCATACGGGCGGCTGGA**CAAGACGGAGATGAGCATCTGGG**AGTGCATCGAGCTGCTCAACGAGTTCATCGA BASE PAIRS  
CCTGCGTATGCCC GCCGACCTGTTCTGCCTCTACTCGTAGACCCTCACGTAGCTCGACGAGTTGCTCAAGTAGCT 151 TO 225

CGACAGTGACCCCGACCTGGACATGCCGCAGATCGAGCACCTCCTCCAAACCGCCGAGGCCATCCGCAAGGACTA BASE PAIRS  
GCTGTCACTGGGGCTGGACCTGTACGGCGTCTAGCTCGTGGAGGAG**GTTTGGCGGCTCCGGTAGG**CGTTCCTGAT 226 TO 300

← Reverse primer

Yellow highlighted region is the site for BsgI used for digestion of amplified DNA.

(B)

Forward primer

Protospacer 1

GCTGAGCTTGGTATTAGTGATCGCTTGCAATGGAAGGAACACTCCATGATATTTGCCATGCCAAACAAACCAGGA BASE PAIRS  
CGACTCGAACCATAATCACTAGCGAACGTTACCTTCCTTGTGAGGTACTATAAACGGTACGGTTTGTTTGGTCCT 1 TO 75

Protospacer 2

GAATACAGCCGTTTTGATTTTCCAGAGACTTTGCCGGCGCCCTTAAATGGAGTGTGGCCATACTGAAAACAAT BASE PAIRS  
CTTATGTCGGCAAACTAAAAGGTCTCTGAAACGGCCGCGGAATTTACCTCACACCCGGTATGACTTTTTGTTA 76 TO 150

GAAATGCTTACTTGGCCGGAAGGTGAAG BASE PAIRS  
CTTTACGAATGAACCGGCCTCTTCCACTTC 151 TO 180

Reverse primer

(C)

Forward primer

GAATTGGTTTTTGCACCTGCAGAAGAGTGGATAAATCGCAGTGACTCTGAAATTATTGATGCTACAATGAAGGAA BASE PAIRS  
CTTAACCAAAAACGTGGACGTCTTCTCACCTATTTAGCGTCACTGAGACTTTAATAACTACGATGTTACTTCCTT 1 TO 75

Protospacer 1

Protospacer 2

CTAGCAAAGCTTTTCCCTGATGAAATTTGGCAGATCAGAGCAAAGCAAATAATTGAAGTATCATGTTGTCAA BASE PAIRS  
GATCGTTTCGAAAAGGGACTACTTTAAAGCCGTCTAGTCTCGTTTCGTTTTTATAACTTCATAGTACAACAGTTT 76 TO 150

ACTCCAAGTCTGTTTATAAACTGTGCCAGGTTGTGAACCTGCCGGCCCTTGCAAAGATCCCCTATAGAGGGG BASE PAIRS  
TGAGGTTCCAGACAAATATTTTGACACGGTCCAACACTTGGGACGGCCGGGAACGTTTCTAGGGGATATCTCCC 151 TO 225

Reverse primer

## File S2

Chimeric guide RNA (cgRNA) for targeting (A) *inositol oxygenase (inox)* and (B) *phytoene desaturase (pds)* genes of wheat, and (C) *pds* gene of *Nicotiana benthamiana*. (i) cgRNA for protospacer 1, (ii) cgRNA for protospacer 2 and (iii) cgRNA for targeting both protospacer 1 and 2. Target region is given in blue font and guide RNA scaffold in red font. Restriction site SpeI (highlighted in yellow) was used for ligation of the two cgRNAs.

### (A)

#### (i)

NNNNNAGACGTACGAGTTTGTGCAGGTTTTAGAGCTAGAAATAGCAAGTTAAAATAAGGCTA  
GTCCGTTATCAACTTGAAAAAGTGGCACCAGTCGGTGCTTTTNNNNNNNN

#### (ii)

NNNNNCAAGACGGAGATGAGCATCTGTTTTAGAGCTAGAAATAGCAAGTTAAAATAAGGCTA  
GTCCGTTATCAACTTGAAAAAGTGGCACCAGTCGGTGCTTTTNNNNNNNN

#### (iii)

NNNNNAGACGTACGAGTTTGTGCAGGTTTTAGAGCTAGAAATAGCAAGTTAAAATAAGGCTA  
GTCCGTTATCAACTTGAAAAAGTGGCACCAGTCGGTGCTTTACTAGTNNNNCAAGACGGAG  
ATGAGCATCTGTTTTAGAGCTAGAAATAGCAAGTTAAAATAAGGCTAGTCCGTTATCAACTT  
GAAAAAGTGGCACCAGTCGGTGCTTTTNNNNNNN

**(B)**

**(i)**

NNNNN**TTTGCCATGCCAAACAAACC**GTTTTAGAGCTAGAAATAGCAAGTTAAAATAAGGCTA  
GTCCGTTATCAACTTGAAAAAGTGGCACCGAGTCGGTGCTTTTNNNNNNNN

**(ii)**

NNNNN**GGCGCCCTTAAATGGAGTGT**GTTTTAGAGCTAGAAATAGCAAGTTAAAATAAGGCTA  
GTCCGTTATCAACTTGAAAAAGTGGCACCGAGTCGGTGCTTTTNNNNNNN

**(C)**

**(i)**

NNNNNGCTTTTCCCTGATGAAATTTGTTTTAGAGCTAGAAATAGCAAGTTAAAATAAGGCTA  
GTCCGTTATCAACTTGAAAAAGTGGCACCGAGTCGGTGCTTTTNNNNNNNN

**(ii)**

NNNNNATCATGTTGTCAAACCTCCAGTTTTAGAGCTAGAAATAGCAAGTTAAAATAAGGCTA  
GTCCGTTATCAACTTGAAAAAGTGGCACCGAGTCGGTGCTTTTNNNNNNNN



**Table S1 Plant expression vectors used in the study.**

| Vector   | Detail                                                                                                                          | Target gene                                 |
|----------|---------------------------------------------------------------------------------------------------------------------------------|---------------------------------------------|
| pCas9    | Expression of FLAG tag and NLS containing Cas9 protein.                                                                         | NA                                          |
| pTpds1   | Expression of cgRNA targeting protospacer 1 of <i>Nicotiana benthamiana phytoene desaturase (pds)</i> gene                      | <i>N. benthamiana pds</i> gene              |
| pTpds2   | Expression of cgRNA targeting protospacer 2 of <i>N. benthamiana pds</i> gene                                                   | <i>N. benthamiana pds</i> gene              |
| pCtpds1  | Co-expression of Cas9 and cgRNA targeting protospacer 1 of <i>N. benthamiana pds</i> gene                                       | <i>N. benthamiana pds</i> gene              |
| pCtpds2  | Co-expression of Cas9 and cgRNA targeting protospacer 2 of <i>N. benthamiana pds</i> gene                                       | <i>N. benthamiana pds</i> gene              |
| pCinox1  | Co-expression of Cas9 and cgRNA targeting protospacer 1 of <i>T. aestivum inositol oxygenase (inox)</i> gene                    | <i>T. aestivum inox</i> gene                |
| pCinox2  | Co-expression of Cas9 and cgRNA targeting protospacer 2 of <i>T. aestivum inox</i> gene                                         | <i>T. aestivum inox</i> gene                |
| pCwpds1  | Co-expression of Cas9 and cgRNA targeting protospacer 1 of <i>T. aestivum pds</i> gene                                          | <i>T. aestivum pds</i> gene                 |
| pCwpds2  | Co-expression of Cas9 and cgRNA targeting protospacer 2 of <i>T. aestivum pds</i> gene                                          | <i>T. aestivum pds</i> gene                 |
| pCinox12 | Co-expression of Cas9 and duplex cgRNAs targeting protospacer 1 and 2 of <i>T. aestivum pds</i> gene                            | <i>T. aestivum pds</i> gene                 |
| pCpin1   | Co-expression of Cas9 and duplex cgRNAs targeting protospacer 1 of both <i>inox</i> and <i>pds</i> gene of <i>T. aestivum</i> . | <i>T. aestivum inox</i> and <i>pds</i> gene |

**Table S2 Specificity analysis of cgRNA.** Table shows average mutation percentage at targeted locus with different mutant cgRNA.

|              | Sequence                | Average mutation (%) |
|--------------|-------------------------|----------------------|
| Normal cgRNA | AGACGTACGAGTTTGTGCAG    | 17.9                 |
| Mutant cgRNA | 1 AGACGTACGAGTTTGTCAA   | 0                    |
|              | 2 AGACGTACGAGTTTGTGCGA  | 0                    |
|              | 3 AGACGTACGAGTTTGTGGCA  | 0                    |
|              | 4 AGACGTACGAGTTTGGTGCA  | 0                    |
|              | 5 AGACGTACGGAGTGCAGTTT  | 0                    |
|              | 6 AGACGTACTAGTTTGTGCAG  | 0                    |
|              | 7 AGACGTACGAGTTTGTGAAG  | 0                    |
|              | 8 AGACGTACGAGTTTGTCTAG  | 0                    |
|              | 9 AGACGTACAAGTTTATGCAG  | 0                    |
|              | 10 AGACGTACGAGTGGGTGCAG | 0                    |
|              | 11 TGACGTACGAGTTTGTGCAG | 2.8                  |
|              | 12 CAACGTACGAGTTTGTGCAG | 2.4                  |
|              | 13 CAGCGTACGAGTTTGTGCAG | 1.6                  |
|              | 14 AGACAGTCGAGTTTGTGCAG | 0                    |
|              | 15 AGACTGCAGAGTTTGTGCAG | 0                    |
