# Supplementary material for: RNA-Guided Genome Editing for Target Gene Mutations in Wheat
Source: PubMed Central journal article supplement (PMC3852385; doi:10.1534/g3.113.008847), 2013-10-11
Supplement: supp_g3.113.008847_FigureS1.pdf [file supp_g3.113.008847_FigureS1.pdf]

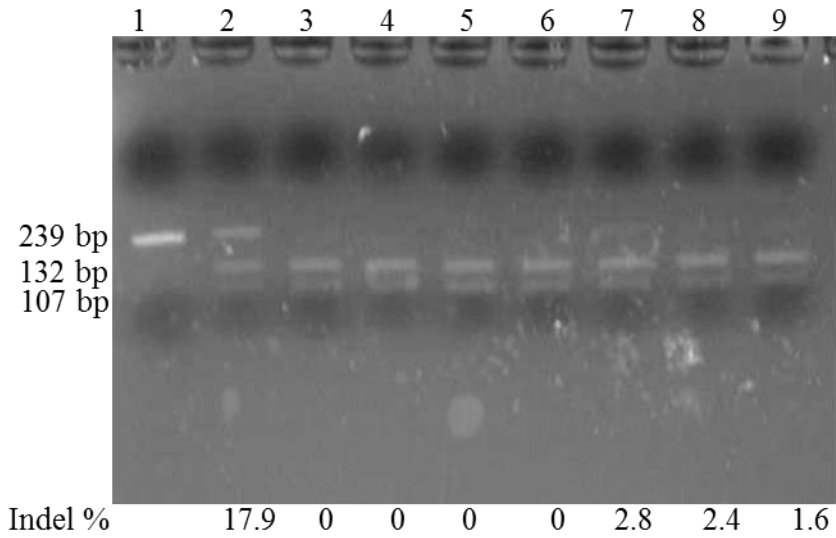

**Figure S1** Sequence specificity analysis of CRISPR-Cas system by using different mutated cgRNAs. List of mutant cgRNA is given in Supplementary table 2. Normal and mutant cgRNAs (targeting protospacer 1 of *inox* gene) were co-expressed with Cas9 in suspension cells of *T. aestivum*. Targeted region was amplified, and digested with BsgI restriction enzyme (BsgI restriction site is present at cleavage position in *inox* protospacer1). BsgI could not digest the mutated DNA amplicon. Lane 1 undigested amplicon and lane 2-9 digested with BsgI. Lane 2, mutated with normal cgRNA; 3, wild type amplicon; 4-9, mutated with mutant cgRNA 1, 6, 9, 11, 12 and 13, respectively. Figure shows that mutations at 3' end of target binding region of cgRNA upto 12<sup>th</sup> bases completely abolished the cleavage activity. However mutations were detected in case of 5' end mutant cgRNA.
