# Supplementary material for: RNA-Guided Genome Editing for Target Gene Mutations in Wheat
Source: PubMed Central journal article supplement (PMC3852385; doi:10.1534/g3.113.008847), 2013-10-11
Supplement: supp_g3.113.008847_FileS1.pdf [file supp_g3.113.008847_FileS1.pdf]

File S1

Partial sequence of (A) *inositol oxygenase (inox)* and (B) *phytoene desaturase (pds)* genes of wheat, and (C) *pds* gene of *Nicotiana benthamiana* used to decide the target for modification by CRISPR-Cas System. Targeted regions are shown in blue font and PAM in red. Primer used for amplification of gene after editing is shown in green.

(A)

Forward primer →

GCTCGACGGCGGCTTCACCGTGCCGGACTCCAACGCCTTCGGCCACACCTT **CAGGGACTACGACGCGGAG**TCGGA BASE PAIRS  
CGAGCTGCCGCCGAAGTGGCACGGCCTGAGGTTGCGGAAGCCGGTGTGGAAGTCCCTGATGCTGCGCCTCAGCCT 1 TO 75

Protospacer 1

GCGGAAGAAGACGGTGGAGGAGTTCTACAGCGTGAACCACATCAACC **AGACGTACGAGTTTGTGCAG**CGGATGCG BASE PAIRS  
CGCCTTCTTCTGCCACCTCCTCAAGATGTCGCACTTGGTGTAGTTGGTCTGCATGCTCAAACACGTTCGCCTACGC 76 TO 150

Protospacer 2

GGACGCATACGGGCGGCTGGA **CAAGACGGAGATGAGCATCTGGG**AGTGCATCGAGCTGCTCAACGAGTTCATCGA BASE PAIRS  
CCTGCGTATGCCC GCCGACCTGTTCTGCCTCTACTCGTAGACCCTCACGTAGCTCGACGAGTTGCTCAAGTAGCT 151 TO 225

CGACAGTGACCCCGACCTGGACATGCCGCAGATCGAGCACCTCCTCCAAACCGCCGAGGCCATCCGCAAGGACTA BASE PAIRS  
GCTGTCACTGGGGCTGGACCTGTACGGCGTCTAGCTCGTGGAGGAG **GTTTGGCGGCTCCGGTAGG**CGTTCCTGAT 226 TO 300

← Reverse primer

Yellow highlighted region is the site for BsgI used for digestion of amplified DNA.

(B)

Forward primer

Protospacer 1

GCTGAGCTTGGTATTAGTGATCGCTTGCAATGGAAGGAACACTCCATGATATTTGCCATGCCAAACAAACCAGGA BASE PAIRS  
CGACTCGAACCATAATCACTAGCGAACGTTACCTTCCTTGTGAGGTACTATAAACGGTACGGTTTGTTTGGTCCT 1 TO 75

Protospacer 2

GAATACAGCCGTTTTGATTTTCCAGAGACTTTGCCGGCGCCCTTAAATGGAGTGTGGCCATACTGAAAAACAAT BASE PAIRS  
CTTATGTCGGCAAACTAAAAGGTCTCTGAAACGGCCGCGGGAATTTACCTCACACCCGGTATGACTTTTTGTTA 76 TO 150

GAAATGCTTACTTGGCCGGAGAAGGTGAAG BASE PAIRS  
CTTTACGAATGAACCGGCCTCTTCCACTTC 151 TO 180

Reverse primer

(C)

Forward primer

GAATTGGTTTTTGCACCTGCAGAAGAGTGGATAAATCGCAGTGACTCTGAAATTATTGATGCTACAATGAAGGAA BASE PAIRS  
CTTAACCAAAAACGTGGACGTCTTCTCACCTATTTAGCGTCACTGAGACTTTAATAACTACGATGTTACTTCCTT 1 TO 75

Protospacer 1

Protospacer 2

CTAGCAAAGCTTTTCCCTGATGAAATTTGGCAGATCAGAGCAAAGCAAATATTGAAGTATCATGTTGTCAA BASE PAIRS  
GATCGTTTCGAAAAGGGACTACTTTAAAGCCGTCTAGTCTCGTTTCGTTTTTATAACTTCATAGTACAACAGTTT 76 TO 150

ACTCCAAGTCTGTTTATAAACTGTGCCAGGTTGTGAACCCTGCCGGCCCTTGCAAAGATCCCCTATAGAGGGG BASE PAIRS  
TGAGGTTCCAGACAAATATTTTGACACGGTCCAACACTTGGGACGGCCGGGAACGTTTCTAGGGGATATCTCCCC 151 TO 225

Reverse primer
