# Supplementary material for: RNA-Guided Genome Editing for Target Gene Mutations in Wheat
Source: PubMed Central journal article supplement (PMC3852385; doi:10.1534/g3.113.008847), 2013-10-11
Supplement: supp_g3.113.008847_TableS1.pdf [file supp_g3.113.008847_TableS1.pdf]

**Table S1 Plant expression vectors used in the study.**

| Vector   | Detail                                                                                                                          | Target gene                                 |
|----------|---------------------------------------------------------------------------------------------------------------------------------|---------------------------------------------|
| pCas9    | Expression of FLAG tag and NLS containing Cas9 protein.                                                                         | NA                                          |
| pTpds1   | Expression of cgRNA targeting protospacer 1 of <i>Nicotiana benthamiana phytoene desaturase (pds)</i> gene                      | <i>N. benthamiana pds</i> gene              |
| pTpds2   | Expression of cgRNA targeting protospacer 2 of <i>N. benthamiana pds</i> gene                                                   | <i>N. benthamiana pds</i> gene              |
| pCtpds1  | Co-expression of Cas9 and cgRNA targeting protospacer 1 of <i>N. benthamiana pds</i> gene                                       | <i>N. benthamiana pds</i> gene              |
| pCtpds2  | Co-expression of Cas9 and cgRNA targeting protospacer 2 of <i>N. benthamiana pds</i> gene                                       | <i>N. benthamiana pds</i> gene              |
| pCinox1  | Co-expression of Cas9 and cgRNA targeting protospacer 1 of <i>T. aestivum inositol oxygenase (inox)</i> gene                    | <i>T. aestivum inox</i> gene                |
| pCinox2  | Co-expression of Cas9 and cgRNA targeting protospacer 2 of <i>T. aestivum inox</i> gene                                         | <i>T. aestivum inox</i> gene                |
| pCwpds1  | Co-expression of Cas9 and cgRNA targeting protospacer 1 of <i>T. aestivum pds</i> gene                                          | <i>T. aestivum pds</i> gene                 |
| pCwpds2  | Co-expression of Cas9 and cgRNA targeting protospacer 2 of <i>T. aestivum pds</i> gene                                          | <i>T. aestivum pds</i> gene                 |
| pCinox12 | Co-expression of Cas9 and duplex cgRNAs targeting protospacer 1 and 2 of <i>T. aestivum pds</i> gene                            | <i>T. aestivum pds</i> gene                 |
| pCpin1   | Co-expression of Cas9 and duplex cgRNAs targeting protospacer 1 of both <i>inox</i> and <i>pds</i> gene of <i>T. aestivum</i> . | <i>T. aestivum inox</i> and <i>pds</i> gene |
