# Supplementary material for: RNA-Guided Genome Editing for Target Gene Mutations in Wheat
Source: PubMed Central journal article supplement (PMC3852385; doi:10.1534/g3.113.008847), 2013-10-11
Supplement: supp_g3.113.008847_TableS2.pdf [file supp_g3.113.008847_TableS2.pdf]

**Table S2 Specificity analysis of cgRNA.** Table shows average mutation percentage at targeted locus with different mutant cgRNA.

|              | Sequence                | Average mutation (%) |
|--------------|-------------------------|----------------------|
| Normal cgRNA | AGACGTACGAGTTTGTGCAG    | 17.9                 |
| Mutant cgRNA | 1 AGACGTACGAGTTTGTCAA   | 0                    |
|              | 2 AGACGTACGAGTTTGTGCGA  | 0                    |
|              | 3 AGACGTACGAGTTTGTGGCA  | 0                    |
|              | 4 AGACGTACGAGTTTGGTGCA  | 0                    |
|              | 5 AGACGTACGGAGTGCAGTTT  | 0                    |
|              | 6 AGACGTACTAGTTTGTGCAG  | 0                    |
|              | 7 AGACGTACGAGTTTGTGAAG  | 0                    |
|              | 8 AGACGTACGAGTTTGTCTAG  | 0                    |
|              | 9 AGACGTACAAGTTTATGCAG  | 0                    |
|              | 10 AGACGTACGAGTGGGTGCAG | 0                    |
|              | 11 TGACGTACGAGTTTGTGCAG | 2.8                  |
|              | 12 CAACGTACGAGTTTGTGCAG | 2.4                  |
|              | 13 CAGCGTACGAGTTTGTGCAG | 1.6                  |
|              | 14 AGACAGTCGAGTTTGTGCAG | 0                    |
|              | 15 AGACTGCAGAGTTTGTGCAG | 0                    |
